# Supplementary material for: Dietary Fat Intake among Chinese Adults and Their Relationships with Blood Lipids: Findings from China Nutrition and Health Surveillance and Comparison with the PURE Study
Source: MDPI journal article supplement (doi:10.3390/nu14245262), 2022-12-09
Supplement: s1 [file s1]

**File S1. Definitions of food groups and nutrients, and methods for calculating intake.**

In present study, we classified 2270 food items in the constantly updating food composition database into 12 food groups, including pork, other meats, processed meats, poultry, fish, dairy and eggs, nuts and soybeans, oils of high monounsaturated fatty acids (MUFA), oils of high polyunsaturated fatty acids (PUFA), MUFA-PUFA balanced oils, oils of high saturated fatty acids (SFA), and other foods. Definition of four types of cooking oils and processed food see Table S1.

**Table S1.** Definitions of selected food groups.

| <b>Food category</b>  | <b>Definition</b>                                                                                                                                                                            |
|-----------------------|----------------------------------------------------------------------------------------------------------------------------------------------------------------------------------------------|
| Processed meat        | Meat that has been transformed through salting, curing, fermentation, smoking, or other processes to enhance flavor or improve preservation, particularly those industrially processed [38]. |
| High-MUFA oils        | Oils with the proportion of monounsaturated fatty acids exceeding 50 percent of total fat content, such as rapeseed oil, tea-seed oil and olive oil.                                         |
| MU-PUFA balanced oils | Oils with the proportions of monounsaturated and polyunsaturated fatty acids both ranging between 30 and 50 percent of total fat content, such as sesame oil, salad oil and peanut oil.      |
| High-PUFA oils        | Oils with the proportions of polyunsaturated fatty acids exceeding 50 percent of total fat content, such as soybean oil, corn oil, sunflower oil and walnut oil.                             |
| High-SFA oils         | Fats with the proportions of saturated fatty acids exceeding 40 percent of total fat content, such as lard, butter and coconut oil.                                                          |

Abbreviation: MUFA, monounsaturated fatty acids; PUFA, polyunsaturated fatty acids; SFA, saturated fatty acids.

**Table S2.** Characteristics of participants according to quintiles of energy-adjusted total fat and fats of various types and sources ( $n = 39,115$ ).

|                                      | Total fat         |                   |                   | Animal fat        |                  |                   | SFA               |                   |                   | MUFA              |                   |                   | PUFA              |                   |                   |
|--------------------------------------|-------------------|-------------------|-------------------|-------------------|------------------|-------------------|-------------------|-------------------|-------------------|-------------------|-------------------|-------------------|-------------------|-------------------|-------------------|
|                                      | Q1                | Q3                | Q5                | Q1                | Q3               | Q5                | Q1                | Q3                | Q5                | Q1                | Q3                | Q5                | Q1                | Q3                | Q5                |
| Total energy intake *, kcal          | 2005.9<br>± 565.5 | 1571.0<br>± 512.2 | 1938.6<br>± 607.5 | 2082.9<br>± 538.8 | 1546.2<br>± 524  | 1905.2<br>± 594.6 | 2040.8<br>± 559.6 | 1550.1<br>± 514.7 | 1904.6<br>± 601.3 | 2038.1<br>± 561.5 | 1564.6<br>± 510.3 | 1896.7<br>± 603.8 | 2075.4<br>± 567.7 | 1568.9<br>± 503.1 | 1865.9<br>± 606.9 |
| Carbohydrate, E%                     | 67.5 ± 8.3        | 53.3 ± 5.3        | 36.4 ± 7.0        | 57.5 ± 11.4       | 53.9 ± 10.8      | 42.6 ± 9.7        | 64.5 ± 10.6       | 52.9 ± 8.6        | 40.1 ± 9.2        | 65.6 ± 9.3        | 52.7 ± 8.1        | 39.3 ± 9.1        | 59.7 ± 12.8       | 53.3 ± 10.8       | 44.3 ± 11         |
| Protein, E%                          | 12.5 ± 2.7        | 13.0 ± 3.5        | 10.9 ± 3.5        | 11.9 ± 3.0        | 12.8 ± 3.2       | 12.9 ± 3.8        | 11.4 ± 2.7        | 12.8 ± 3.4        | 12.5 ± 3.9        | 12.5 ± 2.8        | 13.2 ± 3.5        | 10.7 ± 3.4        | 12.7 ± 3.2        | 12.9 ± 3.4        | 10.9 ± 3.3        |
| Total fat *, E%                      | 20.1 ± 5.5        | 34.5 ± 2.5        | 53.4 ± 7.3        | 31.5 ± 11.7       | 34.2 ± 10.9      | 44.9 ± 9.9        | 24.4 ± 10         | 35.1 ± 8.8        | 47.9 ± 9.7        | 22.1 ± 7.4        | 35.0 ± 7.1        | 50.5 ± 9.1        | 27.5 ± 11.5       | 34.7 ± 10         | 45.4 ± 11.3       |
| Animal fat *, E%                     | 7.0 ± 5.9         | 13.9 ± 8.6        | 22.2 ± 15         | 6.4 ± 3.4         | 11.4 ± 2.8       | 32.1 ± 9.1        | 4.4 ± 4.0         | 11.9 ± 5.7        | 29.7 ± 11.7       | 6.8 ± 5.6         | 14.6 ± 8.7        | 20.5 ± 15.1       | 17.9 ± 12.8       | 14.3 ± 11.1       | 9.9 ± 8.0         |
| Plant fat *, E%                      | 13.0 ± 5.8        | 20.4 ± 8.6        | 31 ± 16.1         | 24.9 ± 11.7       | 22.6 ± 11        | 12.7 ± 9.1        | 19.9 ± 10.5       | 23.0 ± 11.4       | 18.1 ± 13.8       | 15.2 ± 7.8        | 20.2 ± 10.3       | 29.9 ± 14.7       | 9.5 ± 6.3         | 20.2 ± 6.6        | 35.3 ± 11.1       |
| SFA *, E%                            | 4.8 ± 1.9         | 8.0 ± 2.4         | 12.0 ± 4.6        | 6.1 ± 2.1         | 7.4 ± 2.0        | 13.3 ± 3.8        | 4.1 ± 1.3         | 7.5 ± 0.8         | 13.9 ± 3.4        | 5.1 ± 2.0         | 8.4 ± 2.6         | 10.7 ± 5.0        | 8.2 ± 4.8         | 7.9 ± 3.7         | 8.7 ± 2.9         |
| Animal SFA *, E%                     | 2.6 ± 2.1         | 4.9 ± 3.1         | 7.8 ± 5.8         | 2.3 ± 1.3         | 4.0 ± 1.2        | 11.3 ± 4.1        | 1.5 ± 1.3         | 4.1 ± 1.8         | 10.8 ± 4.6        | 2.5 ± 2.1         | 5.1 ± 3.2         | 7.3 ± 5.7         | 6.5 ± 4.9         | 5.0 ± 4.0         | 3.4 ± 2.7         |
| Plant SFA *, E%                      | 2.2 ± 1.0         | 3.1 ± 1.5         | 4.1 ± 2.5         | 3.7 ± 1.8         | 3.4 ± 1.7        | 2.0 ± 1.4         | 2.6 ± 1.0         | 3.4 ± 1.6         | 3.1 ± 2.5         | 2.6 ± 1.2         | 3.3 ± 1.8         | 3.5 ± 2.2         | 1.7 ± 1.3         | 2.9 ± 1.0         | 5.2 ± 1.8         |
| MUFA *, E%                           | 7.3 ± 2.9         | 13.2 ± 3.3        | 22.2 ± 6.5        | 12.0 ± 6.6        | 13.3 ± 6.3       | 18.1 ± 5.2        | 10.2 ± 6.7        | 13.4 ± 6.0        | 18.9 ± 5.1        | 6.7 ± 2.3         | 12.7 ± 1.4        | 24.0 ± 5.1        | 11.3 ± 5.4        | 14.4 ± 5.9        | 15.4 ± 7.8        |
| Animal MUFA*, E%                     | 2.6 ± 2.4         | 5.3 ± 3.5         | 8.8 ± 6.4         | 2.3 ± 1.3         | 4.2 ± 1.6        | 12.8 ± 4.3        | 1.6 ± 1.5         | 4.4 ± 2.3         | 11.9 ± 5.2        | 2.4 ± 2.1         | 5.5 ± 3.4         | 8.3 ± 6.6         | 7.0 ± 5.3         | 5.5 ± 4.6         | 3.7 ± 3.4         |
| Plant MUFA *, E%                     | 4.6 ± 2.9         | 7.9 ± 4.5         | 13.4 ± 8.7        | 9.7 ± 6.5         | 9.0 ± 6.1        | 5.3 ± 4.8         | 8.6 ± 6.8         | 9.0 ± 6.3         | 7.1 ± 5.9         | 4.2 ± 2.1         | 7.2 ± 3.4         | 15.7 ± 8.5        | 4.3 ± 4.0         | 8.9 ± 5.0         | 11.7 ± 7.4        |
| PUFA *, E%                           | 5.7 ± 2.8         | 9.2 ± 4.0         | 13.3 ± 6.7        | 10.4 ± 5.6        | 9.7 ± 5.1        | 7.1 ± 3.4         | 7.6 ± 4.1         | 10.1 ± 5.2        | 9.2 ± 5.5         | 7.8 ± 4.8         | 9.6 ± 5.5         | 10.5 ± 4.4        | 4.1 ± 1.2         | 8.2 ± 0.8         | 17.3 ± 4.9        |
| Dietary fiber <sup>a</sup> *, g      | 11.1 ± 6.6        | 9.8 ± 5.6         | 7.4 ± 5.7         | 10.5 ± 7.3        | 9.8 ± 5.2        | 8.0 ± 6.2         | 10.9 ± 7.4        | 9.7 ± 5.2         | 7.6 ± 5.6         | 11.4 ± 7.6        | 9.6 ± 4.7         | 7.6 ± 6.2         | 9.7 ± 7.6         | 9.8 ± 5           | 8.7 ± 5.9         |
| Dietary cholesterol <sup>a</sup> , g | 0.2 ± 3.8         | 0.2 ± 3.0         | 0.2 ± 6.2         | 0.1 ± 2.6         | 0.3 ± 5.9        | 0.1 ± 3.4         | 0.2 ± 3.9 †       | 0.2 ± 2.9 †       | 0.1 ± 2.9 †       | 0.3 ± 4.7 *       | 0.2 ± 2.9 *       | 0.1 ± 2.3 *       | 0.2 ± 4.2         | 0.2 ± 3.2         | 0.2 ± 6           |
| Vegetables <sup>a</sup> *, g         | 229.6<br>± 155.8  | 242.9<br>± 131.6  | 236.2<br>± 143.7  | 218.5<br>± 155.5  | 237.3<br>± 131.5 | 262.9<br>± 142.6  | 221.1<br>± 153.6  | 243.9<br>± 129.0  | 248.0<br>± 145.5  | 226.3<br>± 157.6  | 242.3<br>± 130.9  | 242.5<br>± 141.8  | 247.5<br>± 162.5  | 246.4<br>± 131.4  | 216.4<br>± 136.8  |
| Fruits <sup>a</sup> , g              | 32.9 ± 74.3       | *38.2 ± 67.2      | *24.3 ± 56.0      | *28.6 ± 69.9      | †39.5 ± 68.7     | †27.0 ± 59.6      | †27.0 ± 67.3      | †38.4 ± 66.5      | †28.6 ± 61.5      | †40.0 ± 82.7      | *37.3 ± 64.3      | *19.4 ± 48.4      | *30.1 ± 73.6      | *33.4 ± 61.6      | *36.1 ± 69 *      |
| Age, year                            | 51.7 ± 10 *       | 50.9 ± 10.4 *     | 51.2 ± 10 *       | 52.1 ± 9.8 *      | 51.2 ± 10.2 *    | 50.1 ± 10.3 *     | 52.1 ± 9.9 *      | 51.2 ± 10.4 *     | 50.2 ± 10.3 *     | 51.4 ± 10 †       | 51.0 ± 10.4 †     | 51.5 ± 10 †       | 50.8 ± 10.2 *     | 51.1 ± 10.4 *     | 51.5 ± 9.9 *      |
| Male *, %                            | 54.1              | 40.3              | 47.1              | 53.8              | 39.0             | 49.4              | 54.1              | 39.5              | 47.3              | 54.6              | 39.8              | 46.6              | 54.3              | 39.7              | 46.3              |
| Urban location, %                    | 30.4 *            | 42.5 *            | 36.7 *            | 28.7 *            | 44.7 *           | 34.9 *            | 27.2 *            | 44.0 *            | 37.5 *            | 32.7 †            | 43.7 †            | 34.4 †            | 28.3 *            | 42.8 *            | 38.3 *            |
| South *, %                           | 42.7              | 60.9              | 79.1              | 39.2              | 59.5             | 86.9              | 41.8              | 60.4              | 82.9              | 33.9              | 61.3              | 86.0              | 69.5              | 63.7              | 46.4              |
| Illiteracy, %                        | 14.7 †            | 12.9 †            | 12.8 †            | 16.1 *            | 12.4 *           | 11.5 *            | 17.3 *            | 12.0 *            | 11.8 *            | 13.0 *            | 12.2 *            | 15.1 *            | 15.3 *            | 12.5 *            | 12.4 *            |
| Current smoker, %                    | 30.2 †            | 24.3 †            | 29.1 †            | 29.0 *            | 23.9 *           | 31.9 *            | 29.7 †            | 23.7 †            | 29.6 †            | 30.1 †            | 25.0 †            | 28.6 †            | 32.9 *            | 23.2 *            | 27.6 *            |
| Excessive drinker, %                 | 15.3 *            | 11.7 *            | 13.9 *            | 14.2 †            | 11.5 †           | 14.6 †            | 14.1 †            | 11.1 †            | 13.6 †            | 15.5 *            | 11.4 *            | 13.8 *            | 16.4 *            | 11.3 *            | 13.4 *            |
| Physical activity, MET-h/week        | 27.3 ± 25.1       | *23.6 ± 22.6      | *26.2 ± 24.3      | *27.0 ± 24.7      | †23.5 ± 22.6     | †27.7 ± 25.3      | †27.9 ± 25.1      | *23.2 ± 22.1      | *26.7 ± 24.8      | *26.7 ± 24.8      | *22.9 ± 22.2      | *27.5 ± 24.7      | *29.0 ± 25.9      | *23.8 ± 22.6      | *24.4 ± 23.5 *    |
| BMI *, kg/m <sup>2</sup>             | 24.3 ± 3.4        | 24.1 ± 3.4        | 24.0 ± 3.4        | 24.4 ± 3.5        | 24.2 ± 3.4       | 23.6 ± 3.3        | 24.2 ± 3.4        | 24.2 ± 3.4        | 23.7 ± 3.4        | 24.5 ± 3.4        | 24.2 ± 3.5        | 23.8 ± 3.3        | 23.9 ± 3.4        | 24.1 ± 3.5        | 24.5 ± 3.5        |
| Hypertension *, %                    | 41.5              | 37.7              | 39.6              | 43.2              | 39.5             | 35.6              | 42.9              | 39.2              | 36.2              | 41.9              | 38.2              | 39.5              | 38.1              | 38.7              | 42.1              |
| Family history *, %                  | 38.8              | 40.0              | 33.8              | 38.1              | 41.9             | 31.8              | 36.9              | 40.8              | 32.0              | 41.3              | 39.9              | 32.1              | 33.0              | 39.2              | 41.2              |

\*  $p_{\text{trend}} < 0.05$ ; when marked in right upper corner of variable names, it means significant linear trends presented across quintiles of all fat variables; otherwise, the linear trend presented only across the quintiles of corresponding fat variable. †  $p < 0.05$  for between/among-group comparison; the position of this symbol means the same as above. <sup>a</sup> Energy adjusted. Abbreviation: MET, metabolic equivalents of task; BMI, body mass index.

**Table S3.** Comparison of the proportion of various fats in total fat intake, stratified by the median of total fat ( $n = 39,115$ ).

|             | <b>&lt;Median, %</b> | <b>≥Median, %</b> | <b><i>p</i> value</b> |
|-------------|----------------------|-------------------|-----------------------|
| SFA         | 23.7                 | 22.9              | <0.0001               |
| Animal SFA  | 13.1                 | 14.7              | <0.0001               |
| Plant SFA   | 10.4                 | 8.2               | <0.0001               |
| MUFA        | 36.7                 | 40.1              | <0.0001               |
| Animal MUFA | 13.5                 | 16.3              | <0.0001               |
| Plant MUFA  | 23.0                 | 23.6              | <0.0001               |
| PUFA        | 28.0                 | 25.4              | <0.0001               |
| Animal PUFA | 3.2                  | 3.6               | <0.0001               |
| Plant PUFA  | 24.7                 | 21.7              | <0.0001               |

**Table S4.** Regression coefficient (95% CI) and standardized coefficients for the association between dietary fats (per 11 g) and lipid markers \*.

| Fats        | Lipid markers | $\beta$ (95% CI)      | Standard $\beta$ (95% CI) | <i>p</i> value |
|-------------|---------------|-----------------------|---------------------------|----------------|
| Total fat   | TC, mmol/L    | 0.010 (0.006–0.014)   | 0.035 (0.021–0.049)       | <0.0001        |
|             | LDL-c, mmol/L | 0.006 (0.002–0.010)   | 0.024 (0.008–0.04)        | 0.001          |
|             | HDL-c, mmol/L | 0.004 (0.002–0.006)   | 0.039 (0.02–0.058)        | <0.0001        |
|             | TG, mmol/L    | –0.005 (–0.009–0.001) | –0.015 (–0.027–0.003)     | 0.057          |
|             | TCHDL         | –0.004 (–0.008–0.000) | –0.012 (–0.023–0.000)     | 0.136          |
|             | TGHDL         | –0.009 (–0.015–0.003) | –0.021 (–0.034–0.007)     | 0.006          |
| SFA         | TC, mmol/L    | 0.120 (0.106–0.134)   | 0.119 (0.106–0.133)       | <0.0001        |
|             | LDL-c, mmol/L | 0.098 (0.086–0.110)   | 0.111 (0.097–0.124)       | <0.0001        |
|             | HDL-c, mmol/L | 0.013 (0.009–0.017)   | 0.036 (0.025–0.047)       | <0.0001        |
|             | TG, mmol/L    | 0.009 (–0.007–0.025)  | 0.008 (–0.006–0.021)      | 0.222          |
|             | TCHDL         | 0.057 (0.041–0.077)   | 0.047 (0.034–0.061)       | <0.0001        |
|             | TGHDL         | –0.005 (–0.025–0.015) | –0.003 (–0.016–0.01)      | 0.642          |
| Animal SFA  | TC, mmol/L    | 0.112 (0.100–0.124)   | 0.106 (0.095–0.117)       | <0.0001        |
|             | LDL-c, mmol/L | 0.089 (0.079–0.099)   | 0.096 (0.085–0.106)       | <0.0001        |
|             | HDL-c, mmol/L | 0.010 (0.006–0.014)   | 0.026 (0.016–0.037)       | <0.0001        |
|             | TG, mmol/L    | 0.041 (0.027–0.055)   | 0.033 (0.022–0.044)       | <0.0001        |
|             | TCHDL         | 0.062 (0.048–0.076)   | 0.049 (0.038–0.06)        | <0.0001        |
|             | TGHDL         | 0.029 (0.011–0.047)   | 0.018 (0.007–0.029)       | 0.002          |
| Plant SFA   | TC, mmol/L    | –0.047 (–0.072–0.022) | –0.02 (–0.03–0.009)       | 0.000          |
|             | LDL-c, mmol/L | –0.028 (–0.052–0.004) | –0.013 (–0.025–0.002)     | 0.019          |
|             | HDL-c, mmol/L | 0.008 (–0.002–0.018)  | 0.009 (–0.002–0.021)      | 0.096          |
|             | TG, mmol/L    | –0.16 (–0.192–0.129)  | –0.057 (–0.068–0.046)     | <0.0001        |
|             | TCHDL         | –0.067 (–0.096–0.038) | –0.024 (–0.034–0.013)     | <0.0001        |
|             | TGHDL         | –0.161 (–0.200–0.122) | –0.044 (–0.055–0.034)     | <0.0001        |
| MUFA        | TC, mmol/L    | –0.005 (–0.013–0.003) | –0.008 (–0.021–0.005)     | 0.196          |
|             | LDL-c, mmol/L | –0.012 (–0.018–0.006) | –0.023 (–0.034–0.012)     | 0.001          |
|             | HDL-c, mmol/L | 0.008 (0.006–0.010)   | 0.037 (0.028–0.046)       | <0.0001        |
|             | TG, mmol/L    | 0.009 (–0.001–0.019)  | 0.013 (–0.001–0.027)      | 0.043          |
|             | TCHDL         | –0.027 (–0.037–0.017) | –0.038 (–0.052–0.024)     | <0.0001        |
|             | TGHDL         | –0.001 (–0.013–0.011) | –0.001 (–0.014–0.012)     | 0.803          |
| Animal MUFA | TC, mmol/L    | 0.105 (0.095–0.115)   | 0.111 (0.101–0.122)       | <0.0001        |
|             | LDL-c, mmol/L | 0.083 (0.073–0.093)   | 0.1 (0.088–0.112)         | <0.0001        |
|             | HDL-c, mmol/L | 0.009 (0.005–0.0129)  | 0.027 (0.015–0.038)       | <0.0001        |
|             | TG, mmol/L    | 0.043 (0.031–0.055)   | 0.039 (0.028–0.049)       | <0.0001        |
|             | TCHDL         | 0.058 (0.046–0.070)   | 0.051 (0.041–0.062)       | <0.0001        |
|             | TGHDL         | 0.032 (0.016–0.048)   | 0.022 (0.011–0.033)       | 0.000          |
| Plant MUFA  | TC, mmol/L    | –0.057 (–0.064–0.049) | –0.08 (–0.091–0.069)      | <0.0001        |
|             | LDL-c, mmol/L | –0.053 (–0.059–0.047) | –0.084 (–0.094–0.075)     | <0.0001        |
|             | HDL-c, mmol/L | 0.003 (0.001–0.005)   | 0.012 (0.004–0.019)       | 0.016          |
|             | TG, mmol/L    | –0.012 (–0.022–0.002) | –0.014 (–0.026–0.003)     | 0.007          |
|             | TCHDL         | –0.055 (–0.063–0.047) | –0.065 (–0.074–0.055)     | <0.0001        |
|             | TGHDL         | –0.017 (–0.029–0.005) | –0.016 (–0.026–0.005)     | 0.004          |
| PUFA        | TC, mmol/L    | –0.025 (–0.035–0.015) | –0.030 (–0.042–0.018)     | <0.0001        |
|             | LDL-c, mmol/L | –0.018 (–0.026–0.010) | –0.025 (–0.036–0.014)     | <0.0001        |
|             | HDL-c, mmol/L | 0.000 (–0.004–0.004)  | 0.000 (–0.013–0.013)      | 0.863          |
|             | TG, mmol/L    | –0.043 (–0.055–0.031) | –0.044 (–0.056–0.032)     | <0.0001        |
|             | TCHDL         | –0.020 (–0.030–0.010) | –0.020 (–0.030–0.010)     | 0.000          |
|             | TGHDL         | –0.040 (–0.054–0.026) | –0.032 (–0.043–0.021)     | <0.0001        |
| Animal PUFA | TC, mmol/L    | 0.422 (0.377–0.467)   | 0.102 (0.091–0.112)       | <0.0001        |

|            |               |                        |                        |         |
|------------|---------------|------------------------|------------------------|---------|
| Plant PUFA | LDL-c, mmol/L | 0.329 (0.290–0.368)    | 0.090 (0.079–0.101)    | <0.0001 |
|            | HDL-c, mmol/L | 0.043 (0.027–0.059)    | 0.029 (0.018–0.039)    | <0.0001 |
|            | TG, mmol/L    | 0.145 (0.092–0.198)    | 0.03 (0.019–0.041)     | <0.0001 |
|            | TCHDL         | 0.217 (0.164–0.270)    | 0.044 (0.033–0.054)    | <0.0001 |
|            | TGHDL         | 0.106 (0.037–0.175)    | 0.017 (0.006–0.028)    | 0.003   |
|            | TC, mmol/L    | −0.038 (−0.046–−0.030) | −0.047 (−0.056–−0.037) | <0.0001 |
|            | LDL-c, mmol/L | −0.029 (−0.037–−0.021) | −0.040 (−0.051–−0.030) | <0.0001 |
|            | HDL-c, mmol/L | −0.001 (−0.005–0.003)  | −0.003 (−0.017–0.010)  | 0.410   |
|            | TG, mmol/L    | −0.044 (−0.054–−0.034) | −0.046 (−0.056–−0.036) | <0.0001 |
|            | TCHDL         | −0.027 (−0.037–−0.017) | −0.028 (−0.038–−0.018) | <0.0001 |
| Animal fat | TGHDL         | −0.04 (−0.054–−0.026)  | −0.032 (−0.043–−0.021) | <0.0001 |
|            | TC, mmol/L    | 0.045 (0.041–0.049)    | 0.115 (0.105–0.125)    | <0.0001 |
|            | LDL-c, mmol/L | 0.035 (0.031–0.039)    | 0.102 (0.09–0.113)     | <0.0001 |
|            | HDL-c, mmol/L | 0.004 (0.002–0.006)    | 0.029 (0.015–0.043)    | <0.0001 |
|            | TG, mmol/L    | 0.017 (0.011–0.029)    | 0.037 (0.024–0.050)    | <0.0001 |
|            | TCHDL         | 0.025 (0.019–0.031)    | 0.054 (0.041–0.066)    | <0.0001 |
|            | TGHDL         | 0.012 (0.006–0.018)    | 0.020 (0.010–0.030)    | 0.001   |
|            | TC, mmol/L    | −0.025 (−0.029–−0.021) | −0.07 (−0.081–−0.059)  | <0.0001 |
|            | LDL-c, mmol/L | −0.021 (−0.025–−0.017) | −0.067 (−0.079–−0.054) | <0.0001 |
|            | HDL-c, mmol/L | 0.001 (−0.001–0.003)   | 0.008 (−0.008–0.023)   | 0.222   |
| Plant fat  | TG, mmol/L    | −0.017 (−0.021–−0.013) | −0.041 (−0.05–−0.031)  | <0.0001 |
|            | TCHDL         | −0.022 (−0.026–−0.018) | −0.052 (−0.061–−0.042) | <0.0001 |
|            | TGHDL         | −0.017 (−0.023–−0.011) | −0.031 (−0.042–−0.021) | <0.0001 |

\* Adjusted for total energy, dietary fiber (energy adjusted), dietary cholesterol (energy adjusted), vegetables (energy adjusted), fruits (energy adjusted), age, sex, north/south region, urban/rural location, education (categorical), smoking (categorical by status and cigarettes), drinking status (categorical by grams), BMI (continuous), physical activity (continuous), sleep time (continuous), diagnosed hypertension (yes/no), and family history (yes/no). Abbreviation: CI, confidence interval; TC, total cholesterol; LDL-c, low-density lipoprotein cholesterol; HDL-c, high-density lipoprotein cholesterol; TG, triglyceride; TCHDL, TC-to HDL-c ratio; TGHDL, TG to HDL-c ratio.

**Table S5.** Blood lipid levels (TC, LDL-c, HDL-c, TCHDL, TG, TGHDL) by quintiles of various dietary fats intake ( $n = 39,115$ ) \*.

|            | Quintiles  | TC, mmol/L | LDL, mmol/L | HDL, mmol/L | TG, mmol/L | TCHDL   | TGHDL   |
|------------|------------|------------|-------------|-------------|------------|---------|---------|
| Total fat  | Q1         | 4.77       | 2.93        | 1.30        | 1.65       | 3.91    | 1.53    |
|            | Q2         | 4.81       | 2.96        | 1.31        | 1.63       | 3.90    | 1.48    |
|            | Q3         | 4.83       | 2.97        | 1.32        | 1.61       | 3.90    | 1.46    |
|            | Q4         | 4.84       | 2.97        | 1.33        | 1.62       | 3.89    | 1.47    |
|            | Q5         | 4.84       | 2.98        | 1.33        | 1.63       | 3.90    | 1.48    |
| Animal fat | $p$        | <0.0001    | 0.002       | <0.0001     | 0.144      | 0.731   | 0.032   |
|            | $p$ -trend | <0.0001    | 0.0002      | <0.0001     | 0.181      | 0.274   | 0.033   |
|            | Q1         | 4.66       | 2.83        | 1.30        | 1.57       | 3.81    | 1.43    |
|            | Q2         | 4.76       | 2.91        | 1.31        | 1.61       | 3.86    | 1.46    |
|            | Q3         | 4.81       | 2.96        | 1.32        | 1.62       | 3.89    | 1.47    |
| Plant fat  | Q4         | 4.86       | 2.99        | 1.32        | 1.65       | 3.92    | 1.51    |
|            | Q5         | 4.95       | 3.07        | 1.33        | 1.67       | 3.97    | 1.51    |
|            | $p$        | <0.0001    | <0.0001     | <0.0001     | <0.0001    | <0.0001 | 0.003   |
|            | $p$ -trend | <0.0001    | <0.0001     | <0.0001     | <0.0001    | <0.0001 | 0.0001  |
|            | Q1         | 4.91       | 3.04        | 1.32        | 1.70       | 3.99    | 1.56    |
| SFA        | Q2         | 4.83       | 2.97        | 1.32        | 1.62       | 3.91    | 1.47    |
|            | Q3         | 4.80       | 2.95        | 1.32        | 1.60       | 3.87    | 1.46    |
|            | Q4         | 4.77       | 2.93        | 1.32        | 1.59       | 3.86    | 1.44    |
|            | Q5         | 4.74       | 2.89        | 1.32        | 1.58       | 3.82    | 1.44    |
|            | $p$        | <0.0001    | <0.0001     | 0.643       | <0.0001    | <0.0001 | <0.0001 |
| Animal SFA | $p$ -trend | <0.0001    | <0.0001     | 0.192       | <0.0001    | <0.0001 | <0.0001 |
|            | Q1         | 4.66       | 2.83        | 1.29        | 1.64       | 3.84    | 1.51    |
|            | Q2         | 4.75       | 2.90        | 1.31        | 1.64       | 3.87    | 1.51    |
|            | Q3         | 4.81       | 2.96        | 1.32        | 1.60       | 3.88    | 1.44    |
|            | Q4         | 4.88       | 3.01        | 1.33        | 1.61       | 3.90    | 1.45    |
| Plant SFA  | Q5         | 4.93       | 3.05        | 1.33        | 1.65       | 3.97    | 1.50    |
|            | $p$        | <0.0001    | <0.0001     | <0.0001     | 0.008      | <0.0001 | 0.005   |
|            | $p$ -trend | <0.0001    | <0.0001     | <0.0001     | 0.905      | <0.0001 | 0.13    |
|            | Q1         | 4.64       | 2.82        | 1.30        | 1.56       | 3.80    | 1.43    |
|            | Q2         | 4.75       | 2.91        | 1.31        | 1.61       | 3.87    | 1.47    |
| MUFA       | Q3         | 4.79       | 2.94        | 1.32        | 1.61       | 3.88    | 1.46    |
|            | Q4         | 4.86       | 3.00        | 1.32        | 1.64       | 3.92    | 1.50    |
|            | Q5         | 4.94       | 3.06        | 1.33        | 1.67       | 3.97    | 1.52    |
|            | $p$        | <0.0001    | <0.0001     | <0.0001     | <0.0001    | <0.0001 | 0.008   |
|            | $p$ -trend | <0.0001    | <0.0001     | <0.0001     | <0.0001    | <0.0001 | 0.001   |
|            | Q1         | 4.88       | 3.00        | 1.31        | 1.72       | 3.96    | 1.58    |
|            | Q2         | 4.79       | 2.94        | 1.31        | 1.64       | 3.89    | 1.50    |
|            | Q3         | 4.79       | 2.94        | 1.32        | 1.62       | 3.87    | 1.47    |
|            | Q4         | 4.81       | 2.96        | 1.32        | 1.58       | 3.88    | 1.43    |
|            | Q5         | 4.81       | 2.96        | 1.32        | 1.54       | 3.87    | 1.39    |
|            | $p$        | <0.0001    | <0.0001     | 0.07        | <0.0001    | <0.0001 | <0.0001 |
|            | $p$ -trend | <0.0001    | 0.096       | 0.009       | <0.0001    | <0.0001 | <0.0001 |
|            | Q1         | 4.80       | 2.96        | 1.30        | 1.64       | 3.95    | 1.53    |
|            | Q2         | 4.82       | 2.97        | 1.31        | 1.61       | 3.91    | 1.47    |
|            | Q3         | 4.85       | 2.98        | 1.33        | 1.59       | 3.89    | 1.43    |
|            | Q4         | 4.84       | 2.98        | 1.33        | 1.63       | 3.90    | 1.48    |
|            | Q5         | 4.79       | 2.92        | 1.33        | 1.67       | 3.85    | 1.51    |
|            | $p$        | <0.0001    | <0.0001     | <0.0001     | <0.0001    | <0.0001 | 0.001   |

|             |            |  |         |         |         |         |         |         |
|-------------|------------|--|---------|---------|---------|---------|---------|---------|
| Animal MUFA | $p$ -trend |  | 0.89    | 0.034   | <0.0001 | 0.035   | <0.0001 | 0.896   |
|             | Q1         |  | 4.67    | 2.84    | 1.30    | 1.57    | 3.82    | 1.44    |
|             | Q2         |  | 4.75    | 2.91    | 1.31    | 1.61    | 3.87    | 1.47    |
|             | Q3         |  | 4.81    | 2.96    | 1.32    | 1.62    | 3.89    | 1.48    |
|             | Q4         |  | 4.85    | 2.99    | 1.32    | 1.64    | 3.91    | 1.49    |
|             | Q5         |  | 4.96    | 3.08    | 1.33    | 1.68    | 3.98    | 1.52    |
| Plant MUFA  | $p$        |  | <0.0001 | <0.0001 | <0.0001 | <0.0001 | <0.0001 | 0.015   |
|             | $p$ -trend |  | <0.0001 | <0.0001 | <0.0001 | <0.0001 | <0.0001 | 0.001   |
|             | Q1         |  | 4.91    | 3.03    | 1.31    | 1.70    | 4.00    | 1.57    |
|             | Q2         |  | 4.84    | 2.99    | 1.31    | 1.60    | 3.92    | 1.46    |
|             | Q3         |  | 4.82    | 2.97    | 1.32    | 1.59    | 3.89    | 1.44    |
|             | Q4         |  | 4.77    | 2.92    | 1.33    | 1.58    | 3.82    | 1.42    |
| PUFA        | Q5         |  | 4.69    | 2.84    | 1.32    | 1.64    | 3.79    | 1.49    |
|             | $p$        |  | <0.0001 | <0.0001 | 0.016   | <0.0000 | <0.0001 | <0.0001 |
|             | $p$ -trend |  | <0.0001 | <0.0001 | 0.005   | 0.001   | <0.0001 | <0.0001 |
|             | Q1         |  | 4.86    | 2.99    | 1.31    | 1.70    | 3.94    | 1.55    |
|             | Q2         |  | 4.82    | 2.96    | 1.32    | 1.64    | 3.90    | 1.49    |
|             | Q3         |  | 4.82    | 2.97    | 1.32    | 1.61    | 3.89    | 1.47    |
|             | Q4         |  | 4.80    | 2.95    | 1.32    | 1.58    | 3.86    | 1.43    |
|             | Q5         |  | 4.78    | 2.93    | 1.32    | 1.56    | 3.87    | 1.42    |
|             | $p$        |  | <0.0001 | 0.0001  | 0.129   | <0.0001 | <0.0001 | <0.0001 |
|             | $p$ -trend |  | <0.0001 | <0.0002 | 0.130   | <0.0001 | <0.0001 | <0.0001 |

\* Adjusted for total energy, dietary fiber (energy adjusted), dietary cholesterol (energy adjusted), vegetables (energy adjusted), fruits (energy adjusted), age, sex, north/south region, urban/rural location, education (categorical), smoking (categorical by status and cigarettes), drinking status (categorical by grams), BMI (continuous), physical activity (continuous), sleep time (continuous), diagnosed hypertension (yes/no), and family history (yes/no).

**Table S6.** Beta coefficient (95% CI) for change in lipid biomarkers for per 11 g increment of animal/plant saturated fats, animal monounsaturated fats, and polyunsaturated fats, stratified by intake levels \*.

| Fats        | Lipid markers | <Median, E%           | ≥Median, E%           | <i>p</i> -interaction |
|-------------|---------------|-----------------------|-----------------------|-----------------------|
| Animal SFA  | TC, mmol/L    | 0.173 (0.147–0.198)   | 0.104 (0.090–0.118)   | <0.0001               |
|             | LDL-c, mmol/L | 0.129 (0.105–0.152)   | 0.086 (0.072–0.100)   | <0.0001               |
|             | HDL-c, mmol/L | 0.023 (0.013–0.033)   | 0.004 (–0.002–0.010)  | <0.0001               |
|             | TG, mmol/L    | 0.058(0.027–0.089)    | 0.046 (0.028–0.064)   | 0.963                 |
|             | TCHDL         | 0.083 (0.055–0.112)   | 0.066 (0.048–0.083)   | 0.586                 |
|             | TGHDL         | 0.036 (–0.005–0.077)  | 0.035 (0.013–0.057)   | 0.462                 |
| Plant SFA   | TC, mmol/L    | –0.035 (–0.088–0.018) | –0.101 (–0.134–0.068) | 0.070                 |
|             | LDL-c, mmol/L | –0.008 (–0.055–0.039) | –0.07 (–0.099–0.041)  | 0.056                 |
|             | HDL-c, mmol/L | 0.011 (–0.007–0.029)  | –0.006 (–0.018–0.006) | 0.296                 |
|             | TG, mmol/L    | –0.228 (–0.291–0.165) | –0.148 (–0.187–0.109) | 0.048                 |
|             | TCHDL         | –0.092 (–0.153–0.031) | –0.065 (–0.102–0.028) | 0.647                 |
|             | TGHDL         | –0.256 (–0.336–0.176) | –0.129 (–0.180–0.078) | 0.017                 |
| Animal MUFA | TC, mmol/L    | 0.151 (0.127–0.175)   | 0.101 (0.087–0.115)   | <0.0001               |
|             | LDL-c, mmol/L | 0.115 (0.093–0.136)   | 0.082 (0.070–0.094)   | 0.000                 |
|             | HDL-c, mmol/L | 0.018 (0.010–0.026)   | 0.005 (0.001–0.009)   | <0.0001               |
|             | TG, mmol/L    | 0.065 (0.038–0.092)   | 0.046 (0.030–0.062)   | 0.687                 |
|             | TCHDL         | 0.075 (0.048–0.102)   | 0.064 (0.048–0.080)   | 0.908                 |
|             | TGHDL         | 0.045 (0.008–0.082)   | 0.036 (0.016–0.056)   | 0.686                 |
| PUFA        | TC, mmol/L    | –0.044 (–0.064–0.024) | –0.054 (–0.066–0.042) | 0.758                 |
|             | LDL-c, mmol/L | –0.029 (–0.047–0.011) | –0.04 (–0.0526–0.028) | 0.961                 |
|             | HDL-c, mmol/L | –0.003(–0.011–0.005)  | –0.007 (–0.011–0.003) | 0.926                 |
|             | TG, mmol/L    | –0.066 (–0.090–0.042) | –0.045 (–0.059–0.031) | 0.156                 |
|             | TCHDL         | –0.030 (–0.054–0.006) | –0.023 (–0.037–0.009) | 0.790                 |
|             | TGHDL         | –0.061 (–0.092–0.030) | –0.036 (–0.056–0.016) | 0.278                 |

\* Stratified by median of total fat intake (68.7 g, corresponding to 34.9% of total energy).



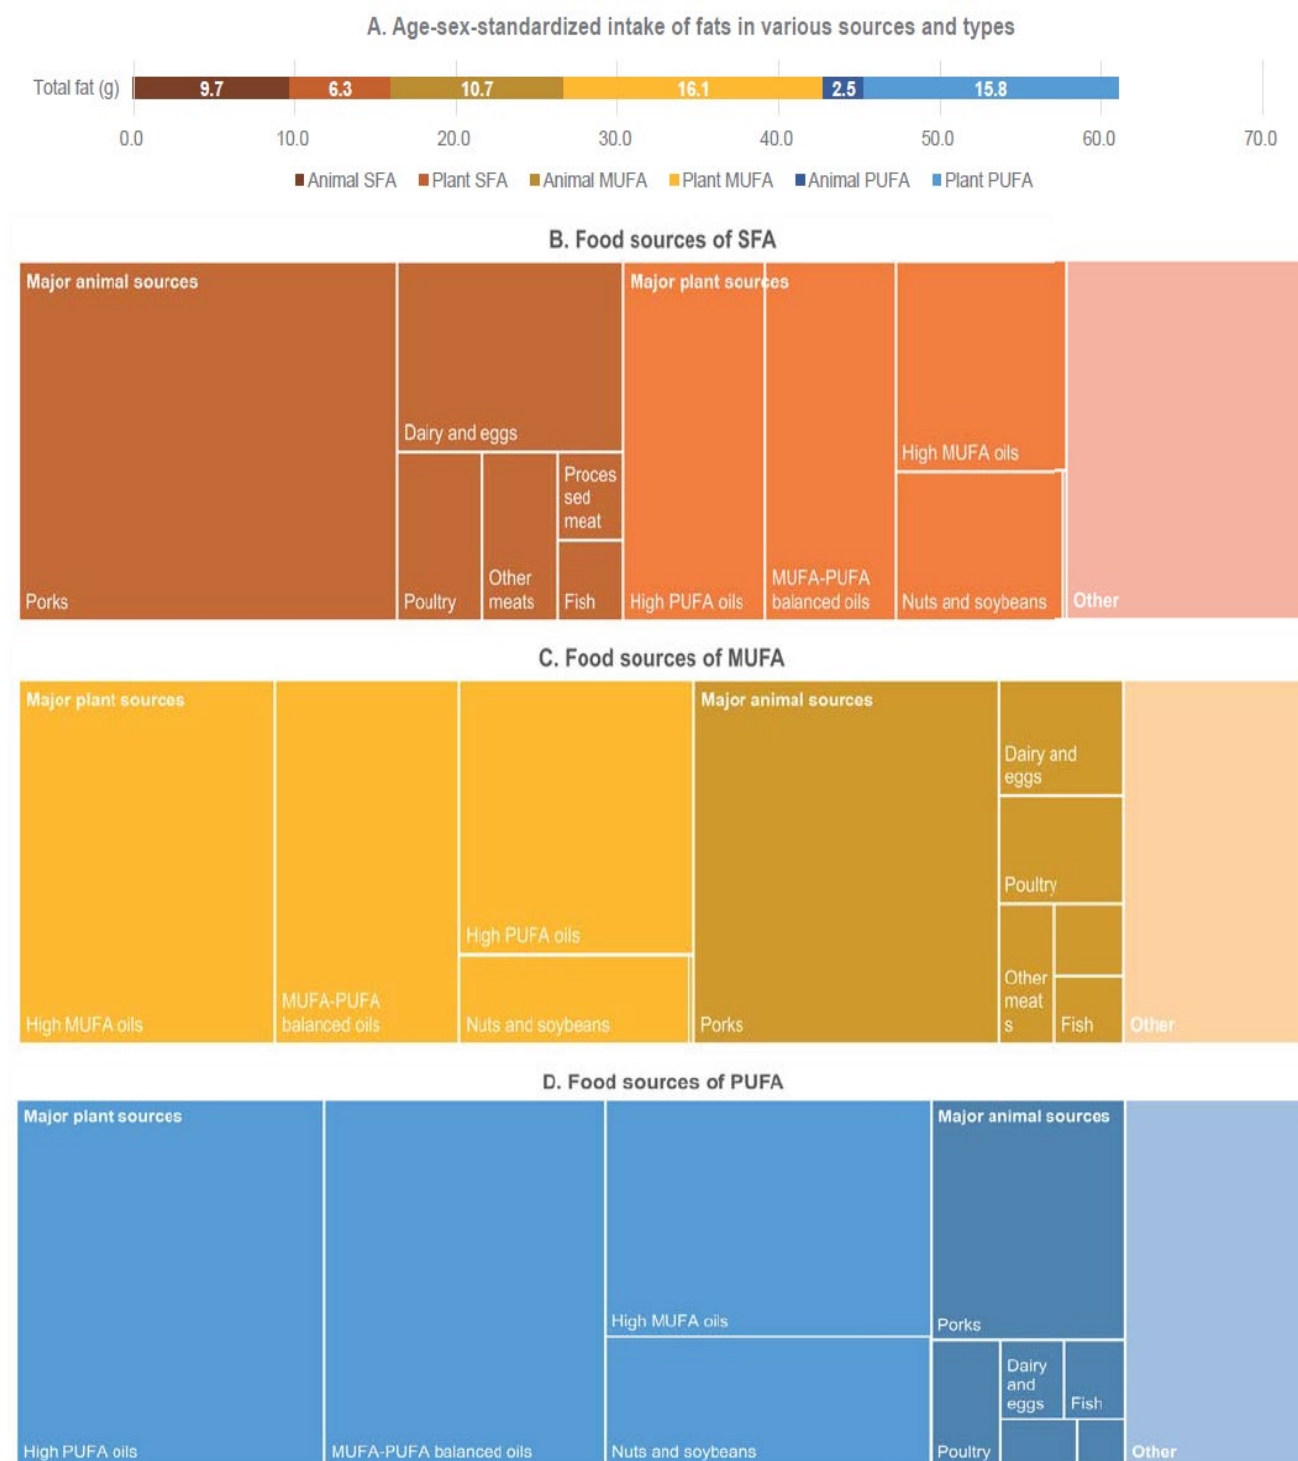

**Figure S1.** Quantity and food sources of dietary fats in various types in survey population. The area in the box represents the proportion of fat from specific food sources in corresponding type of fat. Abbreviation: MUFA, monounsaturated fatty acids; PUFA, polyunsaturated fatty acids; SFA, saturated fatty acids.

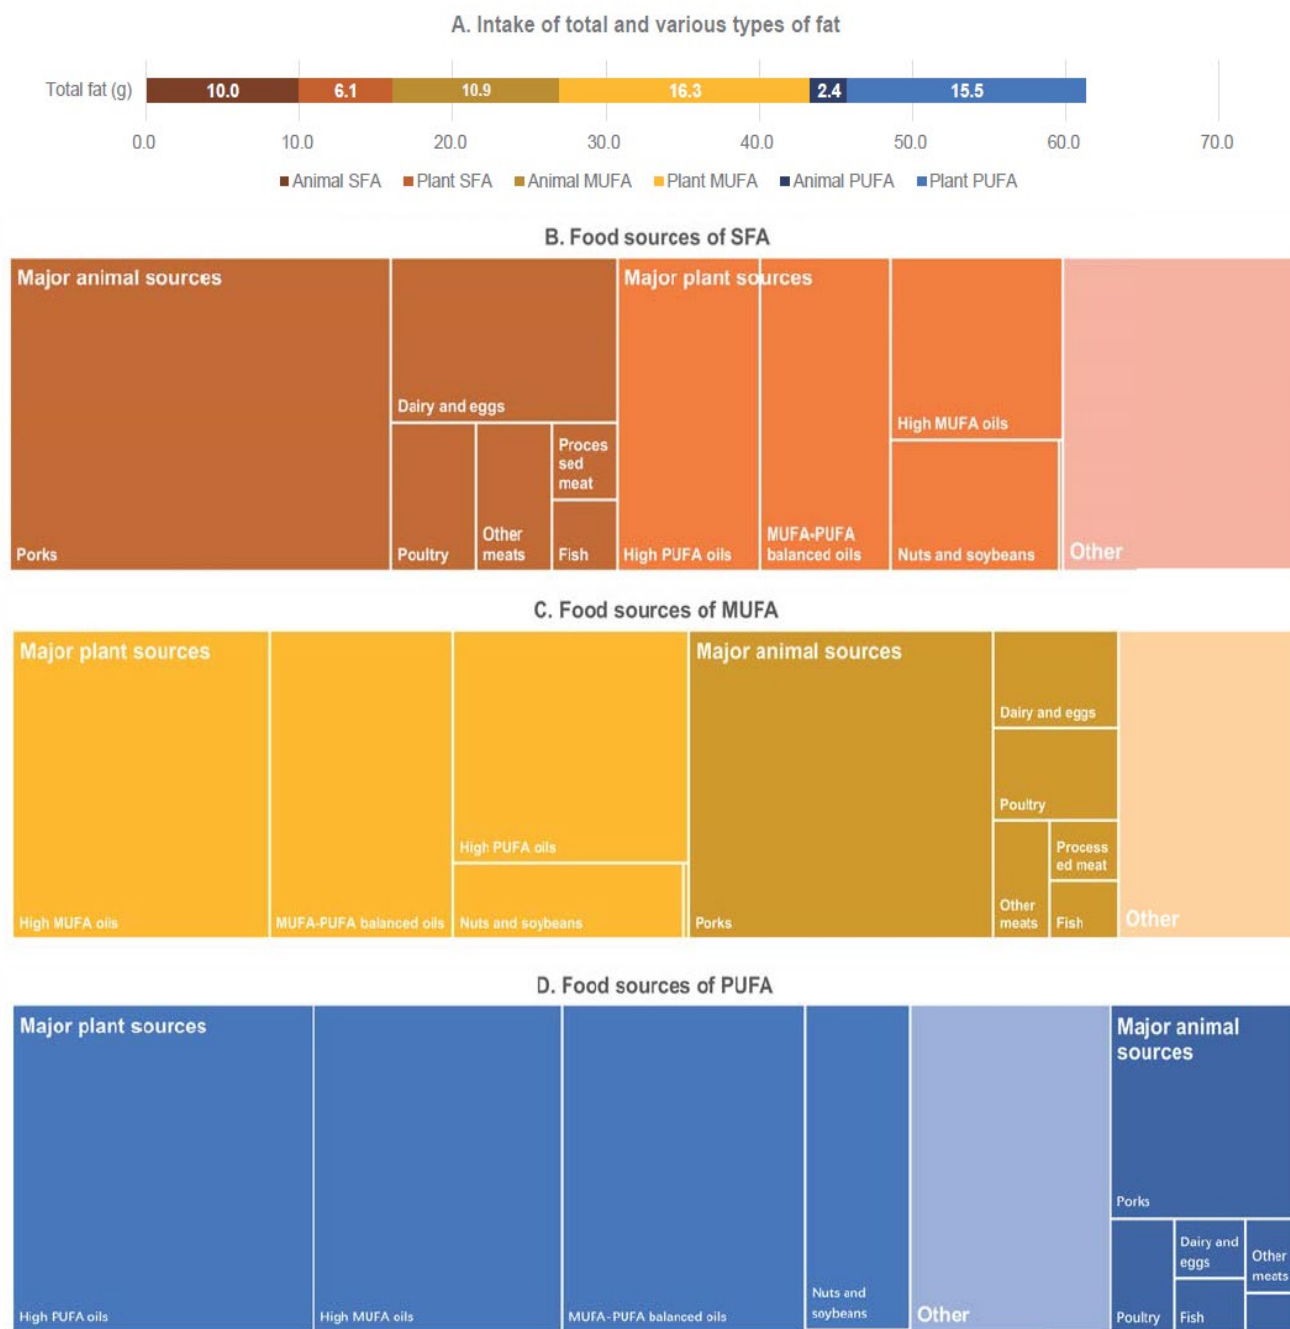

**Figure S2.** Quantity and food sources of dietary fats in various types in selected sample ( $n = 39,115$ ). The area in the box represents the proportion of fat from specific food sources in corresponding type of fat.
